# Supplementary material for: Automated phone call and text reminders for childhood immunisations (PRIMM): a randomised controlled trial in Nigeria
Source: PubMed Central journal article supplement — BMJ Glob Health. 2019 Apr 3;4(2):e001232. doi: 10.1136/bmjgh-2018-001232 (PMC6509606; doi:10.1136/bmjgh-2018-001232), 2019-04-03
Supplement: bmjgh-2018-001232supp001.pdf [file bmjgh-2018-001232supp001.pdf]

**Supplemental Table 1: Effect of Intervention on Primary Outcome Assessed at End of Study.\***

| Immunization     | Control<br>(n=300) | Intervention<br>(n=300) | RR (95% CI)      | RD (95% CI)        | <i>p</i> |
|------------------|--------------------|-------------------------|------------------|--------------------|----------|
| Penta-1, n/N (%) | 289(96)            | 286(95)                 | 0.99 (0.96-1.02) | -0.01 (-0.04-0.02) | 0.54     |
| Penta-2, n/N (%) | 281(94)            | 281(94)                 | 1.00 (0.96-1.04) | 0.00 (-0.04-0.04)  | 1.00     |
| Penta-3, n/N (%) | 273(91)            | 279(93)                 | 1.02 (0.98-1.07) | 0.02 (-0.02-0.06)  | 0.37     |

\* Modified intention to treat analysis includes all subjects regardless of where immunization was received or how it was audited. CI, confidence interval; RR, risk ratio; RD, risk difference.

**Supplemental Table 2: Effect of Intervention on Immunization Receipt by Study Group\***

| Immunization     | Control         | Intervention    | RR (95% CI)      | RD (95% CI)        | <i>p</i> |
|------------------|-----------------|-----------------|------------------|--------------------|----------|
| Penta-1, n/N (%) | 241/252<br>(96) | 240/254<br>(95) | 0.99 (0.95-1.02) | -0.01 (-0.05-0.03) | 0.55     |
| Penta-2, n/N (%) | 225/244<br>(92) | 225/244<br>(92) | 1.00 (0.95-1.05) | 0.00 (-0.05-0.05)  | 1.00     |
| Penta-3, n/N (%) | 196/223<br>(88) | 201/222<br>(91) | 1.03 (0.97-1.10) | 0.03 (-0.03-0.08)  | 0.37     |

\* Per-protocol analysis. Includes only subjects who received immunizations at study sites. CI; confidence interval; RR, risk ratio; RD, risk difference.

**Supplemental Table 3: Mothers' Perceived Barriers to Receiving Immunization.**

| Barrier                                            | Frequency |
|----------------------------------------------------|-----------|
| Long wait time at the immunization clinic          | 508       |
| Transportation cost                                | 380       |
| Distance to the clinic                             | 283       |
| Clinic was not conducive for me and my child       | 276       |
| Negative attitude of the immunization clinic staff | 183       |
| Forgetfulness                                      | 48        |
| Unavailable vaccines                               | 17        |
| Having to use public transportation                | 10        |
| The belief that immunizations are not useful       | 4         |
| The belief that immunizations are harmful          | 2         |

**Supplemental Table 4: Mothers' Reported Biggest Barrier to Receiving Immunizations.**

| Barrier                                      | n (%)    |
|----------------------------------------------|----------|
| Transportation cost                          | 187 (34) |
| Distance to the clinic                       | 21 (4)   |
| Forgetfulness                                | 12 (2)   |
| Long wait time at the immunization clinic    | 208 (55) |
| Clinic was not conducive for me and my child | 9 (2)    |
